# Supplementary material for: Direct and specific chemical control of eukaryotic translation with a synthetic RNA–protein interaction
Source: PubMed Central journal article supplement — Nucleic Acids Res. 2012 Jan 24;40(9):e64. doi: 10.1093/nar/gks028 (PMC3351163; doi:10.1093/nar/gks028), 2012-01-24
Supplement: supp_gks028_nar-01189-met-g-2011-File009.pdf [file supp_gks028_nar-01189-met-g-2011-File009.pdf]

**Supplementary Table S1. Aptamer sequences.**

| <b>Aptamer</b> | <b>Parent aptamer</b> | <b>RNA sequence</b>                                                                                     |
|----------------|-----------------------|---------------------------------------------------------------------------------------------------------|
| <b>5-1.13</b>  | 5-1 <sup>a</sup>      | 5'GGGAGCUCAGAAUAAACGCUCAACUCCUGUAGUGAAGGCAGAGAAAGGU<br>CGAUACGGACGGAAUGUGAUGGCCUUCGACAUCAGGCCCGGAUCCGGC |
| <b>5-11.13</b> | 5-11 <sup>a</sup>     | 5'GGGAGCUGAGAAUAAACGCUCAAAACUAGCAGGCAGAGAAGAGUGGGUG<br>CGACCACAGGAUGUUAUGGCCUGUUCGACAUCAGGCCCGGAUCCGGC  |
| <b>5-14.13</b> | 5-14 <sup>a</sup>     | 5'GGGAGCUGAGAAUAAACGCUCAACAGGAAACAGCAAGACAAACGAUGGG<br>GAGCGUAAGACUGCGAGUGUCGGAUUCGACAUCAGGCCCGGAUCCGGC |
| <b>5-18.13</b> | 5-18 <sup>a</sup>     | 5'GGGAGCUGAGAAUAAACGCUCAAUAGGGAGAGAACUGUGUCAGAAUGUA<br>GUGAACCAGACACGGAGUGGAGUAUUCGACAUCAGGCCCGGAUCCGGC |
| <b>5-29.13</b> | 5-29 <sup>a</sup>     | 5'GGGAGCUCAGAAUAAACGCUCAACUUGCUGCAGAGGGUCGAGAAUAUGU<br>GUGACACUGCGUCGACGGGUUAAGUUCGACAUCAGGCCCGGAUCCGGC |
| <b>5-1.2</b>   | 5-1.13                | 5'GGAUCCAGGCAGAGAAAGGUCGAUACGGACGGAAUGUGAUGGCCUGGAU<br>CCAAA                                            |
| <b>5-1.2m2</b> | 5-1.2                 | 5'GGAUCCAGGCAGUGUAAGGUCGAUACGGACGGAAUGUGAUGGCCUGGAU<br>CCAAA                                            |

<sup>a</sup> From Belmont and Niles (2010).

**Supplementary Table S2. Oligonucleotides used for cloning and qPCR.**

| Oligonucleotide | DNA sequence                             |
|-----------------|------------------------------------------|
| JBOL111         | 5'GCGGTCGACTACAACATGGCTAGCATGACTGGTGGAC  |
| JBOL112         | 5'GCGCCTAGGTCAGTGGTGGTGGTGGTGGTGC        |
| JBOL233         | 5'ATTTATCGGAGTTGCAGTTGCGCC               |
| JBOL234         | 5'AACAAACACTACGGTAGGCTGCGA               |
| JBOL268         | 5'GCGCTCGAGAACATATGTCTAAAGGTGAAGAATTAT   |
| JBOL269         | 5'GCGTCTAGATTATTTGTACAATTCATCCATA        |
| JBOL295         | 5'GCGGTCGACTACAACATGTCTAGATTAGATAAAAAGTA |
| JBOL296         | 5'GCGCCTAGGTCAAGACCCACTTTCACATTTA        |
| JBOL410         | 5'GAGCAGATTGTACTGAGAGTGCACC              |
| JBOL411         | 5'TACGCATCTGTGCGGTATTTCACAC              |
| JBOL412         | 5'CAGAGACCAATCAGTAAAAATCAACGG            |
| <b>JBOL413</b>  | 5'GATCTTTTATGCTTGCTTTTCAAAAAGGCC         |
| ACT1F           | 5'GCCTTGGACTTCGAACAAGA                   |
| ACT1R           | 5'CCAAACCCAAAACAGAAGGA                   |

**Supplementary Table S3. Overlapping oligonucleotides used for PCR assembly of DNA templates for *in vitro* transcription.**

| Product                          | Oligonucleotide    | DNA sequence                                                                                  |
|----------------------------------|--------------------|-----------------------------------------------------------------------------------------------|
| 5-1.13-<br><b>FLuc-A60</b>       | SG178              | 5'TGGCCTTCGACATCAGGCCCGGATCCGGCAACACAAAACCTCGAGAACAT<br>ATGGAAGACGC                           |
|                                  | SG179              | 5'GTAGTGAAGGCAGAGAAAGGTCGATACGGACGGAATGTGATGGCCTTCG<br>ACATCAGGCC                             |
|                                  | SG180              | 5'ATCTAGGGAGCTCAGAATAAACGCTCAACTCCTGTAGTGAAGGCAGAGA<br>AAGGTCGATAC                            |
|                                  | SG181 <sup>a</sup> | 5' <i>CTAATACGACTACTATAGGGAATTATCTAGGGAGCTCAGAATAAACGCTC</i><br>AA                            |
| 5-11.13-<br><b>FLuc-A60</b>      | SG184              | 5'GGCCTGTTCGACATCAGGCCCGGATCCGGCAACACAAAACCTCGAGAACA<br>TATGGAAGACG                           |
|                                  | SG185              | 5'AGCAGGCAGAGAAGAGTGGGTGCGACCACAGGATGTTATGGCCTGTTCG<br>ACATCAGGCC                             |
|                                  | SG186              | 5'GGGAATTATCTAGGGAGCTGAGAATAAACGCTCAAAAACCTAGCAGGCAGA<br>GAAGAGTGGG                           |
|                                  | SG187 <sup>a</sup> | 5' <i>CTAATACGACTACTATAGGGAATTATCTAGGGAGCTGAGAATAAACGCT</i>                                   |
| 5-14.13-<br><b>FLuc-A60</b>      | SG191              | 5'GGATTCGACATCAGGCCCGGATCCGGCAAAACACAAAACCTCGAGAACAT<br>ATGGAAGACGC                           |
|                                  | SG192              | 5'AACAGCAAGACAAACGATGGGGAGCGTAAGACTGCGAGTGTTCGGATTCG<br>ACATCAGGCC                            |
|                                  | SG193              | 5'AATTATCTAGGGAGCTGAGAATAAACGCTCAACAGGAAACAGCAAGACA<br>AACGATGGGGA                            |
|                                  | SG194 <sup>a</sup> | 5' <i>CTAATACGACTACTATAGGGAATTATCTAGGGAGCTGAGAATAAACGCTC</i><br>AA                            |
| 5-18.13-<br><b>FLuc-A60</b>      | SG251              | 5'CGGCAAAACACAAAACCTCGAGAACATATGGAAGACGCCAAAAACATAA<br>AGAAAGGCCCGG                           |
|                                  | SG253              | 5'AACTGTGTCAGAATGTAGTGAACCAGACACGGAGTGGAGTATTCGACAT<br>CAGGCCCGGAT                            |
|                                  | SG254              | 5'GGGAGCTGAGAATAAACGCTCAATAGGGAGAGAAGTGTGTCAGAATGTA<br>GTGAACCAGAC                            |
|                                  | SG255 <sup>a</sup> | 5' <i>CTAATACGACTACTATAGGGAATTATCTAGGGAGCTGAGAATAAACGCTC</i><br>AATAGG                        |
| 5-29.13-<br><b>FLuc-A60</b>      | SG256              | 5'AGTTCGACATCAGGCCCGGATCCGGCAACACAAAACCTCGAGAACATATG<br>GAAGACGCCAA                           |
|                                  | SG257              | 5'GAGGGTCGAGAATATGTGTGACACTGCGTCGACGGTTAAGTTCGACATC<br>AGGCCCGGAT                             |
|                                  | SG259              | 5'AGGGAGCTCAGAATAAACGCTCAACTTGCTGCAGAGGGTCGAGAATATG<br>TGTGACACTGC                            |
|                                  | SG261 <sup>a</sup> | 5' <i>CTAATACGACTACTATAGGGAATTATCTAGGGAGCTCAGAATAAACGCTC</i><br>AACT                          |
| 5-1.2-<br><b>FLuc-A60</b>        | SG151 <sup>a</sup> | 5' <i>CTAATACGACTACTATAGGGAATTATCTAGGATCCAGGCAGAGAAAGG</i>                                    |
| 5-1.2m2-<br><b>FLuc-A60</b>      | SG291 <sup>a</sup> | 5' <i>CTAATACGACTACTATAGGGAATTATCTAGGATCCAGGCAGTGTAAAGTTC</i><br>GA                           |
| (Universal<br>reverse<br>primer) | SG137              | 5'TTTTTTTTTTTTTTTTTTTTTTTTTTTTTTTTTTTTTTTTTTTTTTTTTTTTTTTT<br>TTTTTACAATTTGGACTTCCGCCCTTCTTGG |

<sup>a</sup> Indicates outermost forward primer containing T7 promoter sequence (in italics).

**Supplementary Table S4. 5' UTR sequences resulting when 5-1.2 and its variants are transcriptionally fused to the TEF1 promoter.**

| <b>Aptamer</b>    | <b>RNA sequence</b>                                                                       |
|-------------------|-------------------------------------------------------------------------------------------|
| <b>5-1.2</b>      | AAUUAUCUAGGAUCCAGGCAGAGAAAGGUCGAUACGGACGGAAUGUGAU<br>GGCCUGGAUCCAACACAAAACUCGAGAACAUAUG   |
| <b>5-1.2half</b>  | AAUUAUCUAAGAGAGAGACACCAAAGCGUGUGUGCGGACGGAAUGUGAU<br>GGCCUGGAUCCAACACAAAACUCGAGAACAUAUG   |
| <b>5-1.4d</b>     | AAUUAUCUAGGAUCCAGGCAGAGAAAGGUCGAUACGGACGGAAUGUGGU<br>GGCCUGGAUCCAACACAAAACUCGAGAACAUAUG   |
| <b>5-1.4dhalf</b> | AAUUAUCUAAGAGAGAGACACCAAAGCGUGUGUGCGGACGGAAUGUGGU<br>GGCCUGGAUCCAACACAAAACUCGAGAACAUAUG   |
| <b>5-1.30</b>     | AAUUAUCUAAGAUAUCCAGGCAGAGAAAGGUCGAUACGGACGGAAUGUGGU<br>GGCCUGGAUCCAACACAAAACUCGAGAACAUAUG |
| <b>5-1.31</b>     | AAUUAUCUAAAAUCCAGGCAGAGAAAGGUCGAUACGGACGGAAUGUGGU<br>GGCCUGGAUCCAACACAAAACUCGAGAACAUAUG   |
| <b>5-1.32</b>     | AAUUAUCUAAAAUCCAGGCAGAGAAAGGUCGAUACGGACGGAAUGUGGU<br>GGCCUGGAUCCAACACAAAACUCGAGAACAUAUG   |
| <b>5-1.33</b>     | AAUUAUCUAAAAUACCAGGCAGAGAAAGGUCGAUACGGACGGAAUGUGGU<br>GGCCUGGAUCCAACACAAAACUCGAGAACAUAUG  |

**Supplementary Table S5. Summary of the regulatory behavior observed when using 5-1.2 and 5-1.31 within the endogenous yeast 5'UTRs indicated. FLuc and vYFP were used as reporters.**

| Promoter/5' UTR | %Repression |             |             |                         | Length before aptamer (nt) | % (G+C) |
|-----------------|-------------|-------------|-------------|-------------------------|----------------------------|---------|
|                 | 5-1.2 FLuc  | 5-1.31 vYFP | 5-1.31 FLuc | +TDH3 5' UTR 5-1.2 FLuc |                            |         |
| TEF1            | 87          | 85          | 85          | 95                      | 9                          | 11      |
| ADH1            | 77          | 77          | 89          | 84                      | 44                         | 34      |
| PGK1            | 81          | 84          | 93          | 85                      | 46                         | 24      |
| <b>PYK1</b>     | 94          | 84          | 91          | 80                      | 33                         | 27      |
| TDH3            | 97          | 84          | 95          | N.D.                    | 45                         | 29      |
| TEF2            | 96          | 88          | 92          | 89                      | 28                         | 29      |
| TPI1            | 61          | 71          | 95          | 94                      | 36                         | 25      |

**Supplementary Table S6. Oligonucleotide primers and probes used in qPCR of polysome fractions.**

|                                  | Sequence                                         |
|----------------------------------|--------------------------------------------------|
| <b><u>Firefly luciferase</u></b> |                                                  |
| <b>Primer #1</b>                 | 5'TCCTCTGACACATAATTCGCC                          |
| <b>Primer #2</b>                 | 5'GCTATTCTGATTACACCCGAGG                         |
| <b>Probe</b>                     | 5'HEX/TCCAGATCC/ZEN/ACAACCTTCGCTTCAAAA/IABkFQ    |
| <b><u>vYFP</u></b>               |                                                  |
| <b>Primer #1</b>                 | 5'CACCTTCAAACCTTGACTTCAGC                        |
| <b>Primer #2</b>                 | 5'TGTGTTTTGCTAGATACCCAGATC                       |
| <b>Probe</b>                     | 5'6-FAM/TTTCTTGAA/ZEN/CATAACCTTCTGGCATGGC/IABkFQ |
| <b><u>ACT1</u></b>               |                                                  |
| <b>Primer #1</b>                 | 5'GGCAGATTCCAAACCCAAAAC                          |
| <b>Primer #2</b>                 | 5'TCGAACAAGAAATGCAAACCG                          |
| <b>Probe</b>                     | 5'Cy5/ACGAAAGATTCAGAGCCCCAGAAGC/IAbRQSp          |

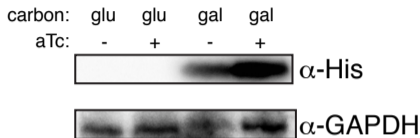

**Supplementary Figure S1:** Western blot measurement of TetR protein. The addition of aTc does not decrease TetR expression. Yeast cells were grown in the presence or absence of aTc plus either glucose or galactose (to repress or induce TetR expression, respectively). Anti-His<sub>6</sub> tag antibody was used to detect His<sub>6</sub>-tagged TetR. Sample loading was verified by GAPDH detection with an anti-GAPDH antibody.

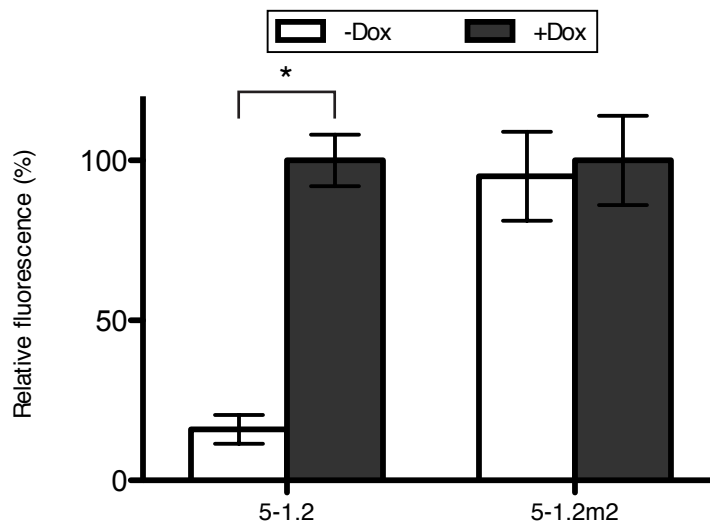

**Supplementary Figure S2:** Constitutively expressed TetR represses translation. TetR expressed constitutively in yeast from the *TDH3* promoter is able to repress translation of vYFP controlled by 5-1.2, but not 5-1.2m2. The addition of Dox relieves vYFP repression. Data represent the mean  $\pm$  s.d. of six experiments. A two-tailed, unpaired t-test was used to calculate the significance ( $\alpha = 0.005$ ) of the difference between induced and uninduced conditions.

\*,  $P = 7.1 \times 10^{-10}$ .



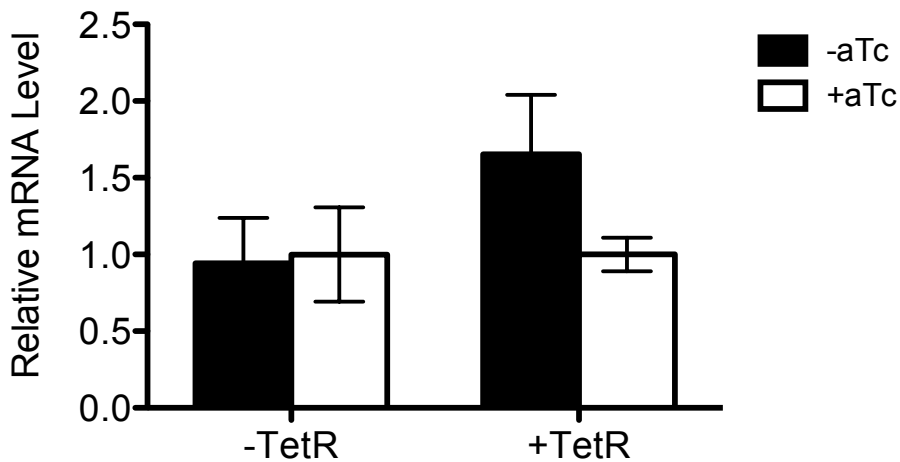

**Supplementary Figure S3:** Quantitative PCR measurement of FLuc mRNA. The addition of aTc does not increase the steady-state level of FLuc mRNA, indicating that regulation by TetR/aTc occurs at the level of translation. For each condition (with or without TetR), values indicate the amount of FLuc mRNA in the presence of 1  $\mu$ M aTc relative to the amount of mRNA in the absence of aTc. The data represent the mean  $\pm$  s.d. of six experiments.

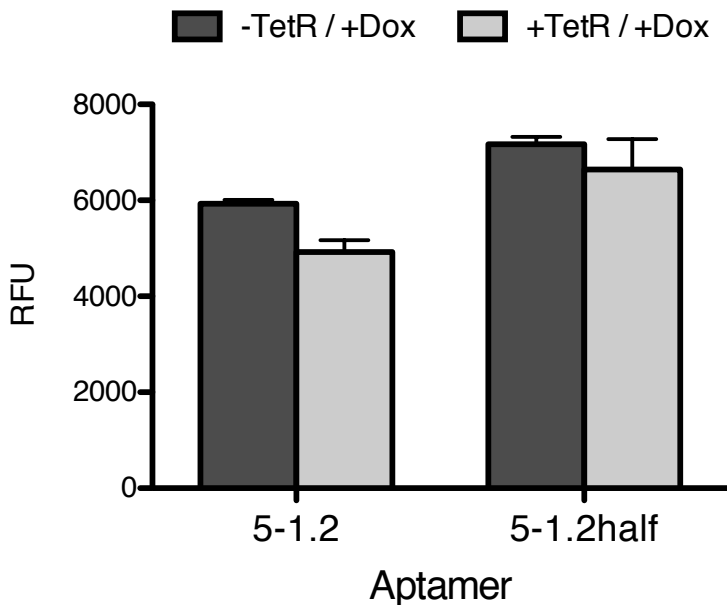

**Supplementary Figure S4.** Removal of 5-1.2 aptamer structure has little effect on basal expression. Flow cytometry measurements show expression levels of aptamer-regulated vYFP. The aptamer located within the 5'UTR of vYFP and the expression status of TetR are indicated. In all cases, cells were grown in the presence of Dox.

**a**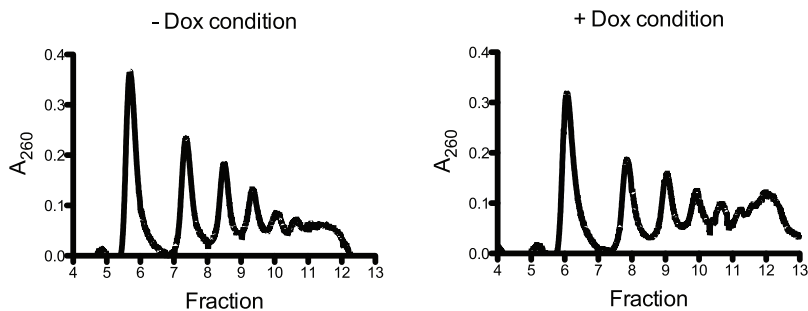**b**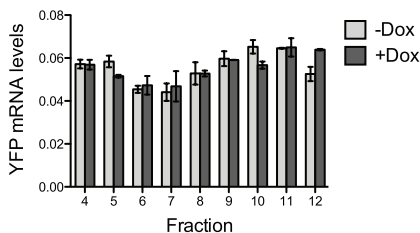

**Supplementary Figure S5.** Polysome profiles of aptamer-containing mRNA are consistent across separate experiments. Growth of yeast and subsequent polysome separation and analysis were performed independently of the experiment shown in Figure 7. **(a)** Polysomes were fractionated from yeast expressing both TetR and a 5-1.2-containing vYFP reporter mRNA, which were grown in the absence and presence of Dox. Polysome profiles for both the - Dox and + Dox growth conditions are shown. **(b)** Quantitative PCR measurements of relative amount of reporter mRNA within each polysome fraction under - Dox and + Dox conditions. Error bars indicate range of values for technical duplicates.
